# Supplementary material for: Clinical, Laboratory, Imaging and Electrocardiographic Differences between Patients with Lyme Disease and Patients with Lyme Disease and B. divergens Antibodies
Source: Preprints.org preprint supplement (doi:10.20944/preprints202401.1739.v2), 2024-03-21
Supplement: Supplementary file 1 [file supplementary]

**Supplementary Material**

Supplementary Table S1. Antibiotic treatment.

|  |  | **Monoinfected**  **(n=73)** | **Infected and with *B. divergens* IgG**  **(n=47)** | **P value** |
| --- | --- | --- | --- | --- |
| Doxycycline | Yes | 21 (31.3%) | 19 (44.2%) | 0.17 |
| No | 46 (68.7%) | 24 (55.8%) |  |
|  |  |  |  |  |
| Doxycycline dosage | mg/day (n=39) | 200 (200-200) | 200 (200-200) | 0.3 |
|  |  |  |  |  |
| Amoxicillin | Yes | 5 (7.5%) | 5 (11.4%) | 0.5 |
| No | 62 (92.5%) | 39 (88.6%) |  |
|  |  |  |  |  |
| Amoxicillin dosage | mg/day (n=11) | 1500 (650-2625) | 1500 (938-2625) | 1 |
|  |  |  |  |  |
| Ceftriaxone | Yes | 10 (14.9%) | 7 (15.9%) | 9 |
| No | 57 (85.1%) | 37 (84.1%) |  |
|  |  |  |  |  |
| Ceftriaxone dosage | mg/day (n=17) | 1500 (1000-2000) | 2000 (1000-2000) | 0.8 |
|  |  |  |  |  |
| Cefuroxime | Yes | 1 (1.5%) | 0 (0%) | 1 |
| No | 66 (98.5%) | 44 (100%) |  |
|  |  |  |  |  |
| Azithromycin | Yes | 0 (0%) | 1 (2.2%) | 0.4 |
| No | 67 (100%) | 44 (97.8%) |  |
|  |  |  |  |  |
| Penicillin G | Yes | 1 (1.5%) | 0 (0%) | 1 |
| No | 66 (98.5%) | 44 (100%) |  |
|  |  |  |  |  |
|  |  |  |  |  |
| Treatment duration | weeks (n=108) | 2.00 (0.00-3.00) | 2.00 (0.00-3.00) | 0.7 |

Values are expressed as median (IQ range) or %.
